# Supplementary material for: Refined model of incremental emplacement based on structural evidence from the granodioritic Newry igneous complex, Northern Ireland
Source: Oxford University Press journal article supplement (doi:10.1130/b31756.1), 2017-11-22
Supplement: 2017367_appendix-3.xls [file 2017367_appendix-3.xls]

## Sheet: Block samples - adjusted dips
Appendix 4: AMS data
Block	susceptibility data				K1			K2			K3			Owens (1974) parameters					Jelinek (1981) parameters		Adjusted to remove negatives
					normalised with directions			normalised with directions			normalised with directions										K1			K3
	Kmean	K1	K2	K3	K1norm	dec	dip	K2norm	dec	dip	K3norm	dec	dip	L	F	M	Mu	H	Pj	Tj	Dec	Dip
C1	633.45	655.96	648.328	596.053	1.034	322.6	17.4	1.023	45.6	-21.3	0.943	88.5	62	0.0113	0.0803	0.14	8	0.0916	1.11017	0.767806	322.6	17.4		88.5	62
C2B	5141.23	5384.77	5157.05	4881.88	1.047	73.4	-29.4	1.003	87.2	59.9	0.951	346.8	6	0.0437	0.0521	0.84	40	0.0959	1.10329	0.107136	253.4	29.4		346.8	6
C2C	1485.06	1537.88	1489.33	1427.98	1.032	74.7	-42.7	1.006	86.5	46.7	0.962	350.2	5.9	0.0261	0.0441	0.59	30.7	0.0702	1.07721	0.27344	254.7	42.7		350.2	5.9
C2D	4354.18	4604.41	4341.53	4116.6	1.057	67.9	-40.9	0.997	102.8	43.4	0.946	354.5	18.3	0.0606	0.0507	1.2	50.1	0.1114	1.11858	-0.0534579	247.9	40.9		354.5	18.3
C3A	663.38	670.1	665.098	654.936	1.01	153.8	19.3	1.002	288.3	63.4	0.988	57.4	17.5	0.0084	0.0135	0.62	32	0.022	1.02361	0.277813	153.8	19.3		57.4	17.5
C3B	919.96	927.553	922.379	909.945	1.008	254.7	-35.4	1.003	340.1	6.5	0.989	241.1	53.8	0.0053	0.0137	0.39	21.4	0.019	1.01991	0.477363	74.7	35.4		241.1	53.8
C3C	623.65	629.086	622.363	619.5	1.009	236.9	-66.3	0.998	52.1	-23.6	0.993	322.9	1.8	0.0106	0.0051	2.09	64.4	0.0157	1.01588	-0.371559	56.9	66.3		322.9	1.8
C5	6513.66	6879.39	6597.02	6064.56	1.056	336.2	41.4	1.013	47.6	-19.8	0.931	118.7	42	0.0433	0.0816	0.53	27.9	0.1249	1.13706	0.340045	336.2	41.4		118.7	42
C6	4026.72	4231.49	3975.66	3873.01	1.05	129.9	-41.9	0.987	182	34.4	0.963	69.7	29	0.0635	0.0235	2.7	69.6	0.087	1.09524	-0.430777	309.9	41.9		69.7	29
C7	2858.44	3052.25	2853.33	2669.74	1.068	111.6	-50.8	0.998	147.1	33.6	0.934	44.8	17.8	0.0697	0.0642	1.08	47.3	0.1339	1.14333	-0.0112847	291.6	50.8		44.8	17.8
C8	367.93	381.301	366.782	355.722	1.036	92.1	-27.6	0.997	46.3	53.1	0.967	349.6	-22.4	0.0392	0.0301	1.3	52.5	0.0693	1.07209	-0.113449	272.1	27.6		169.6	22.4
C11A	139.08	139.985	138.74	138.528	1.007	87.2	-15.4	0.997	69.8	73.9	0.996	356	-4.6	0.0093	0.0015	6.04	80.6	0.0108	1.01137	-0.817271	267.2	15.4		176	4.6
C11B	2408.83	2482.52	2436.42	2307.54	1.028	232.6	-26.4	1.012	327.5	-9.8	0.96	256.1	61.5	0.0153	0.0519	0.3	16.5	0.0672	1.07889	0.541577	52.6	26.4		256.1	61.5
C11C	122.15	124.923	122.917	118.62	1.022	292.8	8.1	1	25.2	16.4	0.978	177.6	71.6	0.0219	0.0219	1	45	0.0439	1.0544	0.0110009	292.8	8.1		177.6	71.6
C11D	80.85	82.333	80.984	79.233	1.018	45.6	4.3	1.002	136.8	15.6	0.98	300.6	73.8	0.0166	0.0215	0.77	37.7	0.0381	1.03925	0.167149	45.6	4.3		300.6	73.8
C11E	410.93	416.494	412.125	404.182	1.013	222.3	7.4	1.003	307.4	-33.5	0.984	323.3	55.5	0.0098	0.0188	0.52	27.6	0.0287	1.03091	0.316887	222.3	7.4		323.3	55.5
C11F	127.99	129.458	129.049	125.467	1.012	151.7	-40.2	1.007	100.7	36.7	0.98	34.5	-28.4	0.0049	0.0272	0.18	10.2	0.0321	1.03508	0.691705	331.7	40.2		214.5	28.4
NC12B	15011.5	16250.6	14765.2	14018.9	1.082	77.2	68.9	0.984	13.7	-9.7	0.935	106.9	-18.5	0.0977	0.0493	1.98	63.2	0.1471	1.16179	-0.300378	77.2	68.9		286.9	18.5
NC13	17035.7	18018.5	16635.2	16453.6	1.058	285.1	-37	0.977	347.9	31.2	0.966	230.3	37.4	0.081	0.0106	7.66	82.6	0.0916	1.10429	-0.75107	105.1	37		230.3	37.4
C19	377.76	390.407	376.89	365.998	1.033	93.7	-31.9	0.998	35.3	40.1	0.969	339.3	-33.6	0.0356	0.0287	1.24	51.1	0.0644	1.06679	-0.077872	273.7	31.9		159.3	33.6
C20	7413.53	8396.08	7189.42	6655.09	1.133	273.1	42.2	0.97	336.7	-26.1	0.898	45.4	36.6	0.1628	0.0721	2.26	66.1	0.2349	1.26742	-0.33642	273.1	42.2		45.4	36.6
C21	3204.02	3286.7	3246.99	3078.37	1.042	87	36.3	1.028	299.2	49.1	0.93	9.5	-16.3	0.0124	0.0526	0.24	13.3	0.065	1.07216	0.762088	87	36.3		189.5	16.3
C22	2770.49	2865.01	2831.24	2615.21	1.034	269	-88.5	1.022	97.1	-1.5	0.944	7.1	-0.2	0.0119	0.0781	0.15	8.7	0.0901	1.10431	0.743624	89	88.5		187.1	0.2
NC12A	18817.9	19918.2	18652.8	17882.6	1.056	269.4	19.4	0.991	9.7	26.9	0.952	148.1	55.8	0.0649	0.0392	1.65	58.8	0.1041	1.11481	-0.225499	269.4	19.4		148.1	55.8
N1A	3353.33	3571.04	3347.67	3141.29	1.064	325.1	25.9	0.999	54	-2.4	0.937	139.1	64	0.0654	0.0617	1.06	46.7	0.1271	1.13686	0.00814748	325.1	25.9		139.1	64
N1B	3488.23	3647.04	3493.56	3324.1	1.044	279.7	26.8	1.003	11.2	3	0.953	107.1	63	0.0418	0.0496	0.84	40.1	0.0914	1.09726	0.121403	279.7	26.8		107.1	63
N2	747.12	797.355	775.488	668.526	1.064	48.1	-1.7	1.038	125.8	82	0.898	318.4	7.8	0.0256	0.14	0.18	10.3	0.1656	1.20879	0.708295	228.1	1.7		318.4	7.8
N3	1353.75	1519.12	1394.08	1148.06	1.116	80.5	-5.7	1.034	22.5	79.3	0.851	349.6	-9	0.0821	0.183	0.45	24.2	0.2651	1.33298	0.436977	260.5	5.7		169.6	9
N4A	52.24	54.142	51.562	51.012	1.037	24.1	-22.9	0.988	97.5	34	0.976	321.1	47	0.0487	0.0122	3.99	75.9	0.0608	1.06555	-0.59686	204.1	22.9		321.1	47
N4B	145.6	151.248	146.298	139.253	1.028	41.1	-34.8	1.008	96.1	39.5	0.964	336.1	31.2	0.0199	0.044	0.45	24.3	0.0639	1.08672	0.388698	221.1	34.8		336.1	31.2
N4C	101.53	104.262	100.983	99.429	1.027	219.7	32.1	0.994	67.9	54.6	0.979	138.3	-13.4	0.0325	0.0153	2.12	64.7	0.0478	1.04959	-0.364655	219.7	32.1		318.3	13.4
N5A	8018.32	8377.08	8102.55	7575.34	1.045	120.4	15.6	1.011	4.3	57.6	0.944	38.8	-27.6	0.0343	0.0674	0.51	26.9	0.1016	1.10796	0.349174	120.4	15.6		218.8	27.6
N5C	7168.53	7450.78	7264.75	6790.05	1.039	134.4	15.8	1.014	15.7	59.5	0.947	52.1	-25.4	0.0252	0.0663	0.38	20.8	0.0915	1.1008	0.474609	134.4	15.8		232.1	25.4
N5D	5933.02	6208.69	5943.81	5646.55	1.046	287.8	-22.1	1.002	7.7	23.1	0.952	236.5	57	0.0441	0.0499	0.88	41.4	0.0941	1.09969	0.0872193	107.8	22.1		236.5	57
N7	5780.42	6105.61	5818.59	5417.07	1.056	93.4	24.1	1.007	266.2	65.7	0.938	2.2	2.7	0.0491	0.0689	0.71	35.5	0.118	1.128	0.198056	93.4	24.1		2.2	2.7
N8	6019.96	6447.76	6078.73	5533.38	1.071	250.8	20.6	1.009	346.3	14.3	0.92	108.7	64.5	0.0618	0.0888	0.7	34.8	0.1505	1.16689	0.215222	250.8	20.6		108.7	64.5
N9	7131.66	7557.66	7166.75	6670.56	1.059	104.4	-26.9	1.005	166.9	42.4	0.936	35.9	35.8	0.054	0.0692	0.78	38	0.1232	1.13356	0.152188	284.4	26.9		35.9	35.8
N10	7499.23	8005.7	7696	6796	1.064	242.2	10.8	1.025	336.3	20.5	0.91	126	66.6	0.0393	0.115	0.34	18.9	0.1542	1.18661	0.522306	242.2	10.8		126	66.6
N11A	8032.01	8800.61	8006.01	7289.4	1.096	125.5	-58.1	0.997	44.2	5.4	0.908	317.5	-31.3	0.0989	0.0892	1.11	48	0.1881	1.20749	-0.00619257	305.5	58.1		137.5	31.3
N11B	1484.51	1609.2	1474.73	1369.6	1.084	88.6	-61.5	0.994	56.6	24.7	0.922	332.9	-13.3	0.0904	0.0712	1.27	51.8	0.1616	1.17526	-0.0709467	268.6	61.5		152.9	13.3
N12	3928.04	4079.36	3942.49	3762.26	1.037	74.1	-7.7	1.004	354.1	52.3	0.959	338.4	-36.6	0.0328	0.0451	0.73	36.1	0.0779	1.08466	0.172851	254.1	7.7		158.4	36.6
N13	9650.54	10404.4	9838.72	8708.53	1.063	70.8	40.4	1.029	278.9	46	0.907	353.5	-14.4	0.0586	0.1171	0.5	26.6	0.1757	1.19973	0.590346	70.8	40.4		173.5	14.4
N14	4834.4	5031.24	4968.84	4503.12	1.04	262.9	-16.5	1.028	342	32.6	0.932	195.6	52.5	0.0129	0.0956	0.14	7.7	0.1085	1.12922	0.788303	82.9	16.5		195.6	52.5
N15	6380.07	6968.28	6523.2	5648.72	1.085	285	-4.1	1.021	12.8	28.1	0.894	202.6	61.6	0.0637	0.1277	0.5	26.5	0.1914	1.23975	0.372023	105	4.1		202.6	61.6
N16A	8576.44	8926.38	8627.36	8175.58	1.039	131.2	-2.1	1.007	43.5	47.1	0.954	39.2	-42.9	0.0349	0.0527	0.66	33.5	0.0875	1.09265	0.266948	311.2	2.1		219.2	42.9
N16B	4663.51	4728.5	4683.01	4579.01	1.014	144.6	-33.6	1.004	79.9	32.7	0.981	21.7	-39.3	0.01	0.0231	0.43	23.3	0.0331	1.03351	0.400897	324.6	33.6		201.7	39.3
N16C	8947.51	9185.32	9126.02	8531.18	1.024	269.3	-2.7	1.018	356.7	43.8	0.958	182.1	46.1	0.0056	0.0606	0.09	5.2	0.0662	1.08528	0.823589	89.3	2.7		182.1	46.1
N17	7774.99	8341.3	7862.21	7121.46	1.07	107	2.7	1.014	331.3	86.2	0.916	17.1	-2.7	0.0557	0.0977	0.57	29.7	0.1534	1.17334	0.308152	107	2.7		197.1	2.7
N18	13175.1	14030.1	13566.6	11928.6	1.065	320.3	-20.5	1.03	33.8	37.1	0.905	252.8	45.8	0.0344	0.1253	0.27	15.4	0.1598	1.18697	0.589472	140.3	20.5		252.8	45.8
N19	8200.99	8413.67	8284.26	7905.04	1.026	104.1	63.7	1.01	356.7	8.4	0.964	82.7	-24.7	0.0158	0.046	0.34	19	0.0619	1.06709	0.495685	104.1	63.7		262.7	24.7
N20A	7503.01	8417.83	7585.38	6505.81	1.121	129.6	-14.8	1.01	60.8	53.8	0.868	30	-32.1	0.1105	0.142	0.78	37.9	0.2525	1.29639	0.184699	309.6	14.8		210	32.1
N20C	5889.23	6661.07	6046.82	4959.79	1.128	117.8	-1.3	1.026	30.7	66.8	0.846	27.3	-23.2	0.1024	0.1797	0.57	29.7	0.2821	1.3515	0.341089	297.8	1.3		207.3	23.2
N21A	9343	9917.74	9555.85	8555.41	1.061	121.2	-13.7	1.023	56.5	60.3	0.916	24.4	-25.8	0.0389	0.1065	0.37	20.1	0.1454	1.16625	0.503611	301.2	13.7		204.4	25.8
N21B	14229	15559.3	14829.3	12298.6	1.094	141.5	-6.3	1.042	61.7	58.1	0.864	47.7	-31.1	0.0517	0.1776	0.29	16.2	0.2293	1.2825	0.587339	321.5	6.3		227.7	31.1
N22A	5889.81	5878.88	5262.65	5027.9	1.091	87.4	2.6	0.976	351.4	66.3	0.934	358.5	-23.5	0.1151	0.0419	2.75	70	0.1569	1.31606	-0.433801	87.4	2.6		178.5	23.5
N22B	5554.81	6120.27	5371.21	5172.94	1.102	216.8	-27.3	0.967	273.2	47.1	0.931	144.3	30.3	0.135	0.0356	3.79	75.2	0.1706	1.1932	-0.550011	36.8	27.3		144.3	30.3
N22C	3258.17	3567.85	3177.11	3029.57	1.094	105	1.9	0.975	3	81.1	0.93	15.3	-8.7	0.1187	0.0451	2.63	69.2	0.1638	1.18335	-0.418109	105	1.9		195.3	8.7
N23	4250.32	4719.84	4201.52	3829.59	1.111	121.6	-10.6	0.989	192.3	60.3	0.9	37.2	27.4	0.1219	0.0897	1.36	53.6	0.2116	1.23325	-0.104557	301.6	10.6		37.2	27.4
N24	5561.32	6196.83	5373.9	5113.23	1.105	113.6	-24.2	0.966	84.9	62.9	0.929	18.4	-11.5	0.1381	0.0374	3.69	74.8	0.1755	1.22103	-0.549776	293.6	24.2		198.4	11.5
N25A	1319.11	1420.24	1307.25	1229.84	1.076	218.2	13.9	0.991	354	71	0.932	124.9	12.8	0.0852	0.0588	1.45	55.4	0.144	1.15553	-0.145535	218.2	13.9		124.9	12.8
N25B	4770.94	5111.35	4782.96	4418.51	1.071	212.9	24.3	1.002	345.3	56.2	0.927	112.4	22	0.0683	0.0754	0.91	42.2	0.1437	1.1571	0.0775994	212.9	24.3		112.4	22
N26	3267.85	3554.66	3307.98	2940.91	1.085	102.6	25.5	1.012	271.7	64	0.903	10.5	4.3	0.0726	0.1085	0.67	33.8	0.1812	1.21108	0.241323	102.6	25.5		10.5	4.3
N27A	172.83	174.988	172.964	170.544	1.012	161.9	-59.1	1.001	90.8	11	0.987	6.9	-28.4	0.0115	0.0142	0.81	38.9	0.0257	1.0261	0.126157	341.9	59.1		186.9	28.4
N27B	324.31	329.008	324.491	319.42	1.015	357.3	52.2	0.999	26.5	-34.1	0.986	106.5	14.3	0.0162	0.013	1.24	51.1	0.0292	1.03004	-0.096272	357.3	52.2		106.5	14.3
N28	7781.83	8189.95	7897.11	7258.42	1.052	282.2	-48	1.014	31	-16.2	0.934	313.9	37.4	0.0386	0.0798	0.48	25.8	0.1184	1.13192	0.381531	102.2	48		313.9	37.4
N29	3821.89	3989.19	3926.21	3550.28	1.042	76.2	-6.3	1.026	159.3	47.7	0.932	351.8	41.6	0.0152	0.0947	0.16	9.1	0.1099	1.1348	0.722596	256.2	6.3		351.8	41.6
N30A	2495.6	2603.39	2525.11	2358.31	1.043	72.6	18.6	1.012	311.2	57.2	0.946	352	-25.9	0.0312	0.066	0.47	25.3	0.0972	1.10657	0.381797	72.6	18.6		172	25.9
N30B	11380.4	12088.2	11597.3	10455.7	1.062	91.9	4.1	1.018	350.2	70.5	0.92	3.3	-19	0.0438	0.0975	0.45	24.2	0.1413	1.16129	0.410404	91.9	4.1		183.3	19
N31	7065.37	7835.34	7079.62	6281.15	1.107	95.9	10.2	1.002	216.3	70.4	0.891	2.9	16.6	0.1045	0.1112	0.94	43.2	0.2157	1.24803	0.0817877	95.9	10.2		2.9	16.6
R1A	1673.79	1788.36	1702.24	1530.78	1.068	25.4	-53.5	1.017	68.1	28.6	0.914	326.2	20.8	0.0513	0.1028	0.5	26.5	0.1541	1.17237	0.371526	205.4	53.5		326.2	20.8
R1B	2001.01	2141.35	2061.05	1800.63	1.07	337.3	-57.1	1.03	55.2	7.7	0.9	320.4	31.7	0.0398	0.1303	0.31	17	0.17	1.19988	0.559588	157.3	57.1		320.4	31.7
R2A	416.21	420.924	414.633	413.064	1.011	280.1	-39.9	0.996	347.8	24.3	0.992	235.3	40.3	0.015	0.0038	4	76	0.0188	1.02014	-0.575783	100.1	39.9		235.3	40.3
R2B	44230.5	46383.9	44532.7	41774.9	1.048	211.9	-16.3	1.006	244.1	71	0.945	124.7	9.6	0.042	0.0609	0.69	34.6	0.1029	1.11131	0.209281	31.9	16.3		124.7	9.6
R3B	382.75	390.757	389.472	368.02	1.021	72.7	-8.6	1.018	18.2	75.3	0.961	340.9	-11.8	0.0035	0.0567	0.06	3.5	0.0602	1.06973	0.902825	252.7	8.6		160.9	11.8
R4A	7016.42	7216.77	7087.69	6744.82	1.028	333.1	-17.5	1.01	79.5	-41.9	0.961	46	42.9	0.0184	0.0487	0.38	20.7	0.0671	1.07256	0.47579	153.1	17.5		46	42.9
R4B	6407.39	6653.76	6370.27	6198.13	1.038	149.2	35.8	0.994	277.9	40.9	0.968	36	28.6	0.0445	0.0262	1.7	59.5	0.0708	1.07418	-0.240747	149.2	35.8		36	28.6
R5A	387.5	392.171	389.725	380.604	1.012	146.3	54.2	1.006	16.7	24.7	0.982	94.8	-24.2	0.0063	0.0235	0.27	15	0.0299	1.03209	0.604786	146.3	54.2		274.8	24.2
R5B	515.77	520.909	516.863	509.548	1.01	177.3	52.2	1.002	38.2	30.4	0.988	115.7	-20.3	0.0079	0.0143	0.55	29	0.0222	1.02262	0.277813	177.3	52.2		295.7	20.3
R6	3799.22	4210.4	4099.41	3087.85	1.108	56.9	-1.6	1.073	135.4	82	0.819	327.1	7.9	0.0342	0.2543	0.13	7.7	0.2886	1.41123	0.78759	236.9	1.6		327.1	7.9
R7A	4107.57	4198.44	4168.28	3956	1.022	287.4	-49.3	1.014	118.8	-40.2	0.964	24	-5.6	0.0077	0.0505	0.15	8.6	0.0582	1.06708	0.730988	107.4	49.3		204	5.6
R7B	5733.72	5913.28	5845.69	5442.2	1.03	143.9	-22	1.019	192.2	58.7	0.951	62.9	21.1	0.0113	0.0682	0.17	9.4	0.0795	1.09415	0.730901	323.9	22		62.9	21.1
R8	2897.24	3013.55	2896.2	2781.97	1.042	327.9	25.6	0.998	45.6	-23.8	0.96	98.6	53.7	0.0437	0.0381	1.15	48.9	0.0817	1.08326	-0.0527543	327.9	25.6		98.6	53.7
R9	3164.99	3653.16	3345.11	2496.72	1.154	183.1	-7.2	1.057	264.1	51.4	0.789	98.7	37.7	0.0971	0.2675	0.36	20	0.3647	1.49141	0.538169	3.1	7.2		98.7	37.7
R10	1392.99	1447.54	1410.28	1321.16	1.039	161.4	11.3	1.012	351.9	78.5	0.949	71.8	-2	0.0267	0.0639	0.42	22.7	0.0906	1.0987	0.418794	161.4	11.3		251.8	2
R11A	986.1	1032.19	995.904	930.21	1.047	154.5	37.6	1.01	8	47.2	0.943	78.3	-17.3	0.0371	0.0667	0.56	29.1	0.1037	1.11152	0.312191	154.5	37.6		258.3	17.8
R11B	935.51	967.582	938.428	900.524	1.035	166.7	40.7	1.003	18	44.8	0.963	91.2	-16.2	0.0318	0.0403	0.79	38.3	0.0721	1.07476	0.128863	166.7	40.7		271.2	16.2
R12	244.91	249.6	246.783	238.342	1.019	155.7	31.9	1.008	359.1	55.8	0.973	72.6	-10.9	0.0116	0.0343	0.34	18.6	0.0459	1.04928	0.530076	155.7	31.9		252.6	10.9
R13	496.89	507.802	502.529	480.329	1.023	43.4	62.5	1.011	18.3	-25.3	0.966	113.1	-10.2	0.0115	0.0456	0.25	14.2	0.0571	1.06091	0.588371	43.4	62.5		293.1	10.2
R14	798.36	820.476	814.766	759.835	1.028	177.9	13	1.02	30.2	74.8	0.952	89.8	-7.9	0.0073	0.0681	0.11	6.2	0.0754	1.08864	0.796563	177.9	13		269.8	7.9
R15	631.46	661.656	630.708	602.027	1.043	153.3	19	1.001	333.8	71	0.955	63.4	-0.1	0.0421	0.0458	0.92	42.6	0.0878	1.09907	0.0674089	153.3	19		243.4	0.1
R16	1951.99	2038.03	2007.54	1810.4	1.044	160.8	-19.7	1.028	171.2	70	0.928	72	3.5	0.0158	0.1007	0.16	8.9	0.1165	1.13767	0.73775	340.8	19.7		72	3.5
R17	654.28	674.176	656.908	631.746	1.03	137.5	-21.4	1.005	125.7	68.2	0.966	45.9	-4	0.025	0.0391	0.64	32.6	0.064	1.06764	0.233946	317.5	21.4		225.9	4
R18	4278.2	4890.37	4249.39	3694.83	1.141	204.8	60.4	0.993	33.5	29.4	0.866	121.4	-3.7	0.1482	0.1274	1.16	49.3	0.2756	1.32418	-0.00755662	204.8	60.4		301.4	3.7
R19	291.92	300.779	297.853	277.114	1.03	42.8	-16.4	1.02	104.2	58.4	0.949	321.1	26.2	0.0101	0.0708	0.14	8.1	0.0809	1.09366	0.761769	222.8	16.4		321.1	26.2
R20	410.05	418.756	410.379	401.01	1.021	70.1	60.9	1.001	7.6	-14.4	0.978	104.4	-24.7	0.0203	0.0227	0.89	41.8	0.043	1.04429	0.0804606	70.1	60.9		284.4	24.7
R21	910.19	931.078	902.408	897.077	1.022	138.9	74.7	0.992	1.1	11.5	0.986	89.1	-10	0.0297	0.0064	4.61	77.8	0.0361	1.04079	-0.661646	138.9	74.7		269.1	10
R22	552.99	579.273	557.649	522.058	1.047	194.9	23.6	1.008	61.6	57.5	0.944	114.5	-21	0.0392	0.0641	0.61	31.5	0.1033	1.111	0.26687	194.9	23.6		294.5	21
R23A	5257.14	5345.88	5244.2	5181.35	1.017	319.6	-13.1	0.998	60.3	-38.5	0.985	34.4	48.5	0.0188	0.0126	1.5	56.3	0.0314	1.03203	-0.179773	139.6	13.1		34.4	48.5
R23B	885.03	897.693	882.543	874.839	1.014	304.2	20.2	0.997	26.5	-20.7	0.989	74.5	60.4	0.0167	0.0088	1.91	62.3	0.0254	1.02657	-0.354552	304.2	20.2		74.5	60.4
R24	9427.08	10035	9522.11	8724.08	1.064	342.1	49.1	1.01	331.7	-40.5	0.926	66.1	-5.2	0.0542	0.0845	0.64	32.7	0.1387	1.15201	0.250124	342.1	49.1		246.1	5.2
R25	981.21	1023.98	1002.65	917.01	1.043	125.8	-54.5	1.022	101	32.9	0.935	18.8	-11.8	0.0217	0.0868	0.25	14	0.1085	1.12433	0.627853	305.8	54.5		198.8	11.8
R26	1001.95	1040.8	1016.03	949.023	1.039	99.1	-36.7	1.014	74.5	50.6	0.947	359.8	-12.2	0.0257	0.0668	0.38	21	0.0925	1.10052	0.474609	279.1	36.7		179.8	12.2
R27	500.73	506.33	499.414	496.456	1.011	215.4	-77.9	0.997	85.5	-7.8	0.991	354.3	-9.1	0.0139	0.0058	2.38	67.2	0.0197	1.02041	-0.395793	35.4	77.9		174.3	9.1
R28	1643.71	1704.93	1682.24	1543.96	1.042	102.3	-60.8	1.025	54.4	20.5	0.933	332.1	-19.8	0.0169	0.0925	0.18	10.4	0.1095	1.11365	0.702253	282.3	60.8		152.1	19.8
R29	310.24	335.467	311.768	283.482	1.051	106.7	-42.2	1.002	50.7	31.7	0.946	343	-31.5	0.049	0.0559	0.88	41.2	0.105	1.18406	0.0927903	286.7	42.2		163	31.5
T1	11631	12038.4	11823.9	11030.5	1.035	63.8	61.4	1.017	333.5	0.2	0.948	63.3	-28.6	0.0185	0.0681	0.27	15.2	0.0866	1.09677	0.600367	63.8	61.4		243.3	28.6
T2A	674.48	702.14	675.89	645.403	1.039	50.4	1.9	1.002	318.1	51.2	0.959	321.9	-38.8	0.0377	0.0424	0.89	41.7	0.0801	1.08806	0.0948729	50.4	1.9		141.9	38.8
T2B	116.28	118.641	117.384	112.821	1.02	61.6	-28.3	1.009	19.9	54.2	0.97	320.3	-20.1	0.0109	0.0393	0.28	15.5	0.0502	1.05445	0.568544	241.6	28.3		140.3	20.1
T3	5197.05	5307.8	5250.22	5033.13	1.021	208.5	-16.3	1.01	138.7	49.8	0.969	106.5	-35.6	0.0112	0.0416	0.27	15	0.0528	1.05774	0.585554	28.5	16.3		286.5	35.6
T4A	134.14	136.495	133.249	132.669	1.018	283.8	-42.5	0.993	23.6	-10.5	0.989	304.5	45.6	0.0243	0.0043	5.69	80	0.0286	1.0311	-0.720677	103.8	42.5		304.5	45.6
T4B	154.11	156.155	153.609	152.579	1.013	270.9	-17.2	0.997	358.2	8.8	0.99	242.1	70.5	0.0168	0.0069	2.44	67.7	0.0237	1.02412	-0.386427	90.9	17.2		242.1	70.5
T5A	149.53	153.801	150.922	143.861	1.029	0.5	-26.7	1.009	71.4	33	0.962	300.8	45.1	0.0192	0.0472	0.41	22.2	0.0664	1.07132	0.416955	180.5	26.7		300.8	45.1
T5B	173.29	178.487	175.788	165.597	1.029	359.7	-32.6	1.015	74.3	22.6	0.956	316.2	48.5	0.0144	0.0594	0.24	13.6	0.0737	1.08247	0.627672	179.7	32.6		316.2	48.5

## Sheet: Block samples
Appendix 3: AMS data
Block	susceptibility data (x 10-6)				K1			K2			K3			Owens (1974) parameters					Jelinek (1981) parameters
					normalised with directions			normalised with directions			normalised with directions
	Kmean	K1	K2	K3	K1norm	dec	dip	K2norm	dec	dip	K3norm	dec	dip	L	F	M	Mu	H	Pj	Tj
C1	633.45	655.96	648.328	596.053	1.034	322.6	17.4	1.023	45.6	-21.3	0.943	88.5	62	0.0113	0.0803	0.14	8	0.0916	1.11017	0.767806
C2B	5141.23	5384.77	5157.05	4881.88	1.047	73.4	-29.4	1.003	87.2	59.9	0.951	346.8	6	0.0437	0.0521	0.84	40	0.0959	1.10329	0.107136
C2C	1485.06	1537.88	1489.33	1427.98	1.032	74.7	-42.7	1.006	86.5	46.7	0.962	350.2	5.9	0.0261	0.0441	0.59	30.7	0.0702	1.07721	0.27344
C2D	4354.18	4604.41	4341.53	4116.6	1.057	67.9	-40.9	0.997	102.8	43.4	0.946	354.5	18.3	0.0606	0.0507	1.2	50.1	0.1114	1.11858	-0.0534579
C3A	663.38	670.1	665.098	654.936	1.01	153.8	19.3	1.002	288.3	63.4	0.988	57.4	17.5	0.0084	0.0135	0.62	32	0.022	1.02361	0.277813
C3B	919.96	927.553	922.379	909.945	1.008	254.7	-35.4	1.003	340.1	6.5	0.989	241.1	53.8	0.0053	0.0137	0.39	21.4	0.019	1.01991	0.477363
C3C	623.65	629.086	622.363	619.5	1.009	236.9	-66.3	0.998	52.1	-23.6	0.993	322.9	1.8	0.0106	0.0051	2.09	64.4	0.0157	1.01588	-0.371559
C5	6513.66	6879.39	6597.02	6064.56	1.056	336.2	41.4	1.013	47.6	-19.8	0.931	118.7	42	0.0433	0.0816	0.53	27.9	0.1249	1.13706	0.340045
C6	4026.72	4231.49	3975.66	3873.01	1.05	129.9	-41.9	0.987	182	34.4	0.963	69.7	29	0.0635	0.0235	2.7	69.6	0.087	1.09524	-0.430777
C7	2858.44	3052.25	2853.33	2669.74	1.068	111.6	-50.8	0.998	147.1	33.6	0.934	44.8	17.8	0.0697	0.0642	1.08	47.3	0.1339	1.14333	-0.0112847
C8	367.93	381.301	366.782	355.722	1.036	92.1	-27.6	0.997	46.3	53.1	0.967	349.6	-22.4	0.0392	0.0301	1.3	52.5	0.0693	1.07209	-0.113449
C11A	139.08	139.985	138.74	138.528	1.007	87.2	-15.4	0.997	69.8	73.9	0.996	356	-4.6	0.0093	0.0015	6.04	80.6	0.0108	1.01137	-0.817271
C11B	2408.83	2482.52	2436.42	2307.54	1.028	232.6	-26.4	1.012	327.5	-9.8	0.96	256.1	61.5	0.0153	0.0519	0.3	16.5	0.0672	1.07889	0.541577
C11C	122.15	124.923	122.917	118.62	1.022	292.8	8.1	1	25.2	16.4	0.978	177.6	71.6	0.0219	0.0219	1	45	0.0439	1.0544	0.0110009
C11D	80.85	82.333	80.984	79.233	1.018	45.6	4.3	1.002	136.8	15.6	0.98	300.6	73.8	0.0166	0.0215	0.77	37.7	0.0381	1.03925	0.167149
C11E	410.93	416.494	412.125	404.182	1.013	222.3	7.4	1.003	307.4	-33.5	0.984	323.3	55.5	0.0098	0.0188	0.52	27.6	0.0287	1.03091	0.316887
C11F	127.99	129.458	129.049	125.467	1.012	151.7	-40.2	1.007	100.7	36.7	0.98	34.5	-28.4	0.0049	0.0272	0.18	10.2	0.0321	1.03508	0.691705
NC12B	15011.5	16250.6	14765.2	14018.9	1.082	77.2	68.9	0.984	13.7	-9.7	0.935	106.9	-18.5	0.0977	0.0493	1.98	63.2	0.1471	1.16179	-0.300378
NC13	17035.7	18018.5	16635.2	16453.6	1.058	285.1	-37	0.977	347.9	31.2	0.966	230.3	37.4	0.081	0.0106	7.66	82.6	0.0916	1.10429	-0.75107
C19	377.76	390.407	376.89	365.998	1.033	93.7	-31.9	0.998	35.3	40.1	0.969	339.3	-33.6	0.0356	0.0287	1.24	51.1	0.0644	1.06679	-0.077872
C20	7413.53	8396.08	7189.42	6655.09	1.133	273.1	42.2	0.97	336.7	-26.1	0.898	45.4	36.6	0.1628	0.0721	2.26	66.1	0.2349	1.26742	-0.33642
C21	3204.02	3286.7	3246.99	3078.37	1.042	87	36.3	1.028	299.2	49.1	0.93	9.5	-16.3	0.0124	0.0526	0.24	13.3	0.065	1.07216	0.762088
C22	2770.49	2865.01	2831.24	2615.21	1.034	269	-88.5	1.022	97.1	-1.5	0.944	7.1	-0.2	0.0119	0.0781	0.15	8.7	0.0901	1.10431	0.743624
NC12A	18817.9	19918.2	18652.8	17882.6	1.056	269.4	19.4	0.991	9.7	26.9	0.952	148.1	55.8	0.0649	0.0392	1.65	58.8	0.1041	1.11481	-0.225499
N1A	3353.33	3571.04	3347.67	3141.29	1.064	325.1	25.9	0.999	54	-2.4	0.937	139.1	64	0.0654	0.0617	1.06	46.7	0.1271	1.13686	0.00814748
N1B	3488.23	3647.04	3493.56	3324.1	1.044	279.7	26.8	1.003	11.2	3	0.953	107.1	63	0.0418	0.0496	0.84	40.1	0.0914	1.09726	0.121403
N2	747.12	797.355	775.488	668.526	1.064	48.1	-1.7	1.038	125.8	82	0.898	318.4	7.8	0.0256	0.14	0.18	10.3	0.1656	1.20879	0.708295
N3	1353.75	1519.12	1394.08	1148.06	1.116	80.5	-5.7	1.034	22.5	79.3	0.851	349.6	-9	0.0821	0.183	0.45	24.2	0.2651	1.33298	0.436977
N4A	52.24	54.142	51.562	51.012	1.037	24.1	-22.9	0.988	97.5	34	0.976	321.1	47	0.0487	0.0122	3.99	75.9	0.0608	1.06555	-0.59686
N4B	145.6	151.248	146.298	139.253	1.028	41.1	-34.8	1.008	96.1	39.5	0.964	336.1	31.2	0.0199	0.044	0.45	24.3	0.0639	1.08672	0.388698
N4C	101.53	104.262	100.983	99.429	1.027	219.7	32.1	0.994	67.9	54.6	0.979	138.3	-13.4	0.0325	0.0153	2.12	64.7	0.0478	1.04959	-0.364655
N5A	8018.32	8377.08	8102.55	7575.34	1.045	120.4	15.6	1.011	4.3	57.6	0.944	38.8	-27.6	0.0343	0.0674	0.51	26.9	0.1016	1.10796	0.349174
N5C	7168.53	7450.78	7264.75	6790.05	1.039	134.4	15.8	1.014	15.7	59.5	0.947	52.1	-25.4	0.0252	0.0663	0.38	20.8	0.0915	1.1008	0.474609
N5D	5933.02	6208.69	5943.81	5646.55	1.046	287.8	-22.1	1.002	7.7	23.1	0.952	236.5	57	0.0441	0.0499	0.88	41.4	0.0941	1.09969	0.0872193
N7	5780.42	6105.61	5818.59	5417.07	1.056	93.4	24.1	1.007	266.2	65.7	0.938	2.2	2.7	0.0491	0.0689	0.71	35.5	0.118	1.128	0.198056
N8	6019.96	6447.76	6078.73	5533.38	1.071	250.8	20.6	1.009	346.3	14.3	0.92	108.7	64.5	0.0618	0.0888	0.7	34.8	0.1505	1.16689	0.215222
N9	7131.66	7557.66	7166.75	6670.56	1.059	104.4	-26.9	1.005	166.9	42.4	0.936	35.9	35.8	0.054	0.0692	0.78	38	0.1232	1.13356	0.152188
N10	7499.23	8005.7	7696	6796	1.064	242.2	10.8	1.025	336.3	20.5	0.91	126	66.6	0.0393	0.115	0.34	18.9	0.1542	1.18661	0.522306
N11A	8032.01	8800.61	8006.01	7289.4	1.096	125.5	-58.1	0.997	44.2	5.4	0.908	317.5	-31.3	0.0989	0.0892	1.11	48	0.1881	1.20749	-0.00619257
N11B	1484.51	1609.2	1474.73	1369.6	1.084	88.6	-61.5	0.994	56.6	24.7	0.922	332.9	-13.3	0.0904	0.0712	1.27	51.8	0.1616	1.17526	-0.0709467
N12	3928.04	4079.36	3942.49	3762.26	1.037	74.1	-7.7	1.004	354.1	52.3	0.959	338.4	-36.6	0.0328	0.0451	0.73	36.1	0.0779	1.08466	0.172851
N13	9650.54	10404.4	9838.72	8708.53	1.063	70.8	40.4	1.029	278.9	46	0.907	353.5	-14.4	0.0586	0.1171	0.5	26.6	0.1757	1.19973	0.590346
N14	4834.4	5031.24	4968.84	4503.12	1.04	262.9	-16.5	1.028	342	32.6	0.932	195.6	52.5	0.0129	0.0956	0.14	7.7	0.1085	1.12922	0.788303
N15	6380.07	6968.28	6523.2	5648.72	1.085	285	-4.1	1.021	12.8	28.1	0.894	202.6	61.6	0.0637	0.1277	0.5	26.5	0.1914	1.23975	0.372023
N16A	8576.44	8926.38	8627.36	8175.58	1.039	131.2	-2.1	1.007	43.5	47.1	0.954	39.2	-42.9	0.0349	0.0527	0.66	33.5	0.0875	1.09265	0.266948
N16B	4663.51	4728.5	4683.01	4579.01	1.014	144.6	-33.6	1.004	79.9	32.7	0.981	21.7	-39.3	0.01	0.0231	0.43	23.3	0.0331	1.03351	0.400897
N16C	8947.51	9185.32	9126.02	8531.18	1.024	269.3	-2.7	1.018	356.7	43.8	0.958	182.1	46.1	0.0056	0.0606	0.09	5.2	0.0662	1.08528	0.823589
N17	7774.99	8341.3	7862.21	7121.46	1.07	107	2.7	1.014	331.3	86.2	0.916	17.1	-2.7	0.0557	0.0977	0.57	29.7	0.1534	1.17334	0.308152
N18	13175.1	14030.1	13566.6	11928.6	1.065	320.3	-20.5	1.03	33.8	37.1	0.905	252.8	45.8	0.0344	0.1253	0.27	15.4	0.1598	1.18697	0.589472
N19	8200.99	8413.67	8284.26	7905.04	1.026	104.1	63.7	1.01	356.7	8.4	0.964	82.7	-24.7	0.0158	0.046	0.34	19	0.0619	1.06709	0.495685
N20A	7503.01	8417.83	7585.38	6505.81	1.121	129.6	-14.8	1.01	60.8	53.8	0.868	30	-32.1	0.1105	0.142	0.78	37.9	0.2525	1.29639	0.184699
N20C	5889.23	6661.07	6046.82	4959.79	1.128	117.8	-1.3	1.026	30.7	66.8	0.846	27.3	-23.2	0.1024	0.1797	0.57	29.7	0.2821	1.3515	0.341089
N21A	9343	9917.74	9555.85	8555.41	1.061	121.2	-13.7	1.023	56.5	60.3	0.916	24.4	-25.8	0.0389	0.1065	0.37	20.1	0.1454	1.16625	0.503611
N21B	14229	15559.3	14829.3	12298.6	1.094	141.5	-6.3	1.042	61.7	58.1	0.864	47.7	-31.1	0.0517	0.1776	0.29	16.2	0.2293	1.2825	0.587339
N22A	5889.81	5878.88	5262.65	5027.9	1.091	87.4	2.6	0.976	351.4	66.3	0.934	358.5	-23.5	0.1151	0.0419	2.75	70	0.1569	1.31606	-0.433801
N22B	5554.81	6120.27	5371.21	5172.94	1.102	216.8	-27.3	0.967	273.2	47.1	0.931	144.3	30.3	0.135	0.0356	3.79	75.2	0.1706	1.1932	-0.550011
N22C	3258.17	3567.85	3177.11	3029.57	1.094	105	1.9	0.975	3	81.1	0.93	15.3	-8.7	0.1187	0.0451	2.63	69.2	0.1638	1.18335	-0.418109
N23	4250.32	4719.84	4201.52	3829.59	1.111	121.6	-10.6	0.989	192.3	60.3	0.9	37.2	27.4	0.1219	0.0897	1.36	53.6	0.2116	1.23325	-0.104557
N24	5561.32	6196.83	5373.9	5113.23	1.105	113.6	-24.2	0.966	84.9	62.9	0.929	18.4	-11.5	0.1381	0.0374	3.69	74.8	0.1755	1.22103	-0.549776
N25A	1319.11	1420.24	1307.25	1229.84	1.076	218.2	13.9	0.991	354	71	0.932	124.9	12.8	0.0852	0.0588	1.45	55.4	0.144	1.15553	-0.145535
N25B	4770.94	5111.35	4782.96	4418.51	1.071	212.9	24.3	1.002	345.3	56.2	0.927	112.4	22	0.0683	0.0754	0.91	42.2	0.1437	1.1571	0.0775994
N26	3267.85	3554.66	3307.98	2940.91	1.085	102.6	25.5	1.012	271.7	64	0.903	10.5	4.3	0.0726	0.1085	0.67	33.8	0.1812	1.21108	0.241323
N27A	172.83	174.988	172.964	170.544	1.012	161.9	-59.1	1.001	90.8	11	0.987	6.9	-28.4	0.0115	0.0142	0.81	38.9	0.0257	1.0261	0.126157
N27B	324.31	329.008	324.491	319.42	1.015	357.3	52.2	0.999	26.5	-34.1	0.986	106.5	14.3	0.0162	0.013	1.24	51.1	0.0292	1.03004	-0.096272
N28	7781.83	8189.95	7897.11	7258.42	1.052	282.2	-48	1.014	31	-16.2	0.934	313.9	37.4	0.0386	0.0798	0.48	25.8	0.1184	1.13192	0.381531
N29	3821.89	3989.19	3926.21	3550.28	1.042	76.2	-6.3	1.026	159.3	47.7	0.932	351.8	41.6	0.0152	0.0947	0.16	9.1	0.1099	1.1348	0.722596
N30A	2495.6	2603.39	2525.11	2358.31	1.043	72.6	18.6	1.012	311.2	57.2	0.946	352	-25.9	0.0312	0.066	0.47	25.3	0.0972	1.10657	0.381797
N30B	11380.4	12088.2	11597.3	10455.7	1.062	91.9	4.1	1.018	350.2	70.5	0.92	3.3	-19	0.0438	0.0975	0.45	24.2	0.1413	1.16129	0.410404
N31	7065.37	7835.34	7079.62	6281.15	1.107	95.9	10.2	1.002	216.3	70.4	0.891	2.9	16.6	0.1045	0.1112	0.94	43.2	0.2157	1.24803	0.0817877
R1A	1673.79	1788.36	1702.24	1530.78	1.068	25.4	-53.5	1.017	68.1	28.6	0.914	326.2	20.8	0.0513	0.1028	0.5	26.5	0.1541	1.17237	0.371526
R1B	2001.01	2141.35	2061.05	1800.63	1.07	337.3	-57.1	1.03	55.2	7.7	0.9	320.4	31.7	0.0398	0.1303	0.31	17	0.17	1.19988	0.559588
R2A	416.21	420.924	414.633	413.064	1.011	280.1	-39.9	0.996	347.8	24.3	0.992	235.3	40.3	0.015	0.0038	4	76	0.0188	1.02014	-0.575783
R2B	44230.5	46383.9	44532.7	41774.9	1.048	211.9	-16.3	1.006	244.1	71	0.945	124.7	9.6	0.042	0.0609	0.69	34.6	0.1029	1.11131	0.209281
R3B	382.75	390.757	389.472	368.02	1.021	72.7	-8.6	1.018	18.2	75.3	0.961	340.9	-11.8	0.0035	0.0567	0.06	3.5	0.0602	1.06973	0.902825
R4A	7016.42	7216.77	7087.69	6744.82	1.028	333.1	-17.5	1.01	79.5	-41.9	0.961	46	42.9	0.0184	0.0487	0.38	20.7	0.0671	1.07256	0.47579
R4B	6407.39	6653.76	6370.27	6198.13	1.038	149.2	35.8	0.994	277.9	40.9	0.968	36	28.6	0.0445	0.0262	1.7	59.5	0.0708	1.07418	-0.240747
R5A	387.5	392.171	389.725	380.604	1.012	146.3	54.2	1.006	16.7	24.7	0.982	94.8	-24.2	0.0063	0.0235	0.27	15	0.0299	1.03209	0.604786
R5B	515.77	520.909	516.863	509.548	1.01	177.3	52.2	1.002	38.2	30.4	0.988	115.7	-20.3	0.0079	0.0143	0.55	29	0.0222	1.02262	0.277813
R6	3799.22	4210.4	4099.41	3087.85	1.108	56.9	-1.6	1.073	135.4	82	0.819	327.1	7.9	0.0342	0.2543	0.13	7.7	0.2886	1.41123	0.78759
R7A	4107.57	4198.44	4168.28	3956	1.022	287.4	-49.3	1.014	118.8	-40.2	0.964	24	-5.6	0.0077	0.0505	0.15	8.6	0.0582	1.06708	0.730988
R7B	5733.72	5913.28	5845.69	5442.2	1.03	143.9	-22	1.019	192.2	58.7	0.951	62.9	21.1	0.0113	0.0682	0.17	9.4	0.0795	1.09415	0.730901
R8	2897.24	3013.55	2896.2	2781.97	1.042	327.9	25.6	0.998	45.6	-23.8	0.96	98.6	53.7	0.0437	0.0381	1.15	48.9	0.0817	1.08326	-0.0527543
R9	3164.99	3653.16	3345.11	2496.72	1.154	183.1	-7.2	1.057	264.1	51.4	0.789	98.7	37.7	0.0971	0.2675	0.36	20	0.3647	1.49141	0.538169
R10	1392.99	1447.54	1410.28	1321.16	1.039	161.4	11.3	1.012	351.9	78.5	0.949	71.8	-2	0.0267	0.0639	0.42	22.7	0.0906	1.0987	0.418794
R11A	986.1	1032.19	995.904	930.21	1.047	154.5	37.6	1.01	8	47.2	0.943	78.3	-17.3	0.0371	0.0667	0.56	29.1	0.1037	1.11152	0.312191
R11B	935.51	967.582	938.428	900.524	1.035	166.7	40.7	1.003	18	44.8	0.963	91.2	-16.2	0.0318	0.0403	0.79	38.3	0.0721	1.07476	0.128863
R12	244.91	249.6	246.783	238.342	1.019	155.7	31.9	1.008	359.1	55.8	0.973	72.6	-10.9	0.0116	0.0343	0.34	18.6	0.0459	1.04928	0.530076
R13	496.89	507.802	502.529	480.329	1.023	43.4	62.5	1.011	18.3	-25.3	0.966	113.1	-10.2	0.0115	0.0456	0.25	14.2	0.0571	1.06091	0.588371
R14	798.36	820.476	814.766	759.835	1.028	177.9	13	1.02	30.2	74.8	0.952	89.8	-7.9	0.0073	0.0681	0.11	6.2	0.0754	1.08864	0.796563
R15	631.46	661.656	630.708	602.027	1.043	153.3	19	1.001	333.8	71	0.955	63.4	-0.1	0.0421	0.0458	0.92	42.6	0.0878	1.09907	0.0674089
R16	1951.99	2038.03	2007.54	1810.4	1.044	160.8	-19.7	1.028	171.2	70	0.928	72	3.5	0.0158	0.1007	0.16	8.9	0.1165	1.13767	0.73775
R17	654.28	674.176	656.908	631.746	1.03	137.5	-21.4	1.005	125.7	68.2	0.966	45.9	-4	0.025	0.0391	0.64	32.6	0.064	1.06764	0.233946
R18	4278.2	4890.37	4249.39	3694.83	1.141	204.8	60.4	0.993	33.5	29.4	0.866	121.4	-3.7	0.1482	0.1274	1.16	49.3	0.2756	1.32418	-0.00755662
R19	291.92	300.779	297.853	277.114	1.03	42.8	-16.4	1.02	104.2	58.4	0.949	321.1	26.2	0.0101	0.0708	0.14	8.1	0.0809	1.09366	0.761769
R20	410.05	418.756	410.379	401.01	1.021	70.1	60.9	1.001	7.6	-14.4	0.978	104.4	-24.7	0.0203	0.0227	0.89	41.8	0.043	1.04429	0.0804606
R21	910.19	931.078	902.408	897.077	1.022	138.9	74.7	0.992	1.1	11.5	0.986	89.1	-10	0.0297	0.0064	4.61	77.8	0.0361	1.04079	-0.661646
R22	552.99	579.273	557.649	522.058	1.047	194.9	23.6	1.008	61.6	57.5	0.944	114.5	-21	0.0392	0.0641	0.61	31.5	0.1033	1.111	0.26687
R23A	5257.14	5345.88	5244.2	5181.35	1.017	319.6	-13.1	0.998	60.3	-38.5	0.985	34.4	48.5	0.0188	0.0126	1.5	56.3	0.0314	1.03203	-0.179773
R23B	885.03	897.693	882.543	874.839	1.014	304.2	20.2	0.997	26.5	-20.7	0.989	74.5	60.4	0.0167	0.0088	1.91	62.3	0.0254	1.02657	-0.354552
R24	9427.08	10035	9522.11	8724.08	1.064	342.1	49.1	1.01	331.7	-40.5	0.926	66.1	-5.2	0.0542	0.0845	0.64	32.7	0.1387	1.15201	0.250124
R25	981.21	1023.98	1002.65	917.01	1.043	125.8	-54.5	1.022	101	32.9	0.935	18.8	-11.8	0.0217	0.0868	0.25	14	0.1085	1.12433	0.627853
R26	1001.95	1040.8	1016.03	949.023	1.039	99.1	-36.7	1.014	74.5	50.6	0.947	359.8	-12.2	0.0257	0.0668	0.38	21	0.0925	1.10052	0.474609
R27	500.73	506.33	499.414	496.456	1.011	215.4	-77.9	0.997	85.5	-7.8	0.991	354.3	-9.1	0.0139	0.0058	2.38	67.2	0.0197	1.02041	-0.395793
R28	1643.71	1704.93	1682.24	1543.96	1.042	102.3	-60.8	1.025	54.4	20.5	0.933	332.1	-19.8	0.0169	0.0925	0.18	10.4	0.1095	1.11365	0.702253
R29	310.24	335.467	311.768	283.482	1.051	106.7	-42.2	1.002	50.7	31.7	0.946	343	-31.5	0.049	0.0559	0.88	41.2	0.105	1.18406	0.0927903
T1	11631	12038.4	11823.9	11030.5	1.035	63.8	61.4	1.017	333.5	0.2	0.948	63.3	-28.6	0.0185	0.0681	0.27	15.2	0.0866	1.09677	0.600367
T2A	674.48	702.14	675.89	645.403	1.039	50.4	1.9	1.002	318.1	51.2	0.959	321.9	-38.8	0.0377	0.0424	0.89	41.7	0.0801	1.08806	0.0948729
T2B	116.28	118.641	117.384	112.821	1.02	61.6	-28.3	1.009	19.9	54.2	0.97	320.3	-20.1	0.0109	0.0393	0.28	15.5	0.0502	1.05445	0.568544
T3	5197.05	5307.8	5250.22	5033.13	1.021	208.5	-16.3	1.01	138.7	49.8	0.969	106.5	-35.6	0.0112	0.0416	0.27	15	0.0528	1.05774	0.585554
T4A	134.14	136.495	133.249	132.669	1.018	283.8	-42.5	0.993	23.6	-10.5	0.989	304.5	45.6	0.0243	0.0043	5.69	80	0.0286	1.0311	-0.720677
T4B	154.11	156.155	153.609	152.579	1.013	270.9	-17.2	0.997	358.2	8.8	0.99	242.1	70.5	0.0168	0.0069	2.44	67.7	0.0237	1.02412	-0.386427
T5A	149.53	153.801	150.922	143.861	1.029	0.5	-26.7	1.009	71.4	33	0.962	300.8	45.1	0.0192	0.0472	0.41	22.2	0.0664	1.07132	0.416955
T5B	173.29	178.487	175.788	165.597	1.029	359.7	-32.6	1.015	74.3	22.6	0.956	316.2	48.5	0.0144	0.0594	0.24	13.6	0.0737	1.08247	0.627672
